# Supplementary material for: A theoretical study on the ORR electrocatalytic activity of axial ligand modified cobalt polyphthalocyanine
Source: Royal Society of Chemistry journal article supplement (doi:10.1039/d3cp03707j), 2023-01-01
Supplement: d3cp03707j1.pdf [file d3cp03707j1.pdf]

## Supporting Information

### **Theoretical study on the ORR electrocatalytic activity of axial ligand modified polyphthalocyanine cobalt**

Guilin Wang<sup>a,b</sup>, Xiaoli Yang<sup>a</sup>, Ruiying Wang<sup>a</sup>, Jianfeng Jia<sup>a,\*</sup>

<sup>a</sup>Key Laboratory of Magnetic Molecules and Magnetic Information Materials (Ministry of Education), School of Chemistry and Material Science, Shanxi Normal University, Taiyuan 030031, China

<sup>b</sup>Department of Physics and Electronic Engineering, Yuncheng University, Yuncheng 044000, China

E-mail: [jjajf@dns.sxnu.edu.cn](mailto:jjajf@dns.sxnu.edu.cn)

CoPPc-F

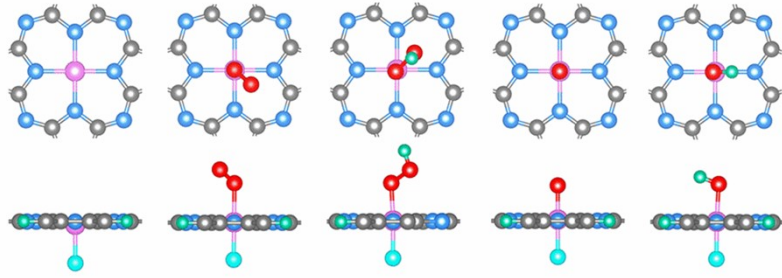

\* \*O<sub>2</sub> \*OOH \*O \*OH

CoPPc-OH

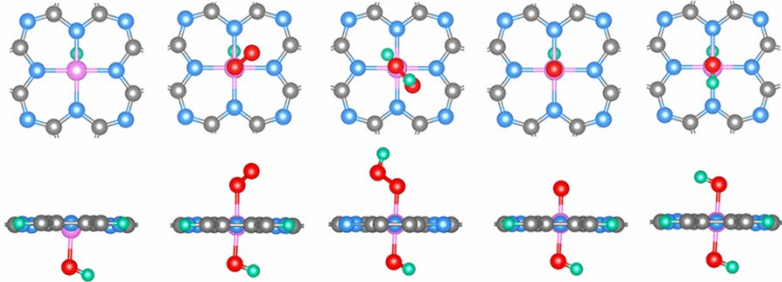

\* \*O<sub>2</sub> \*OOH \*O \*OH

CoPPc-OCH<sub>3</sub>

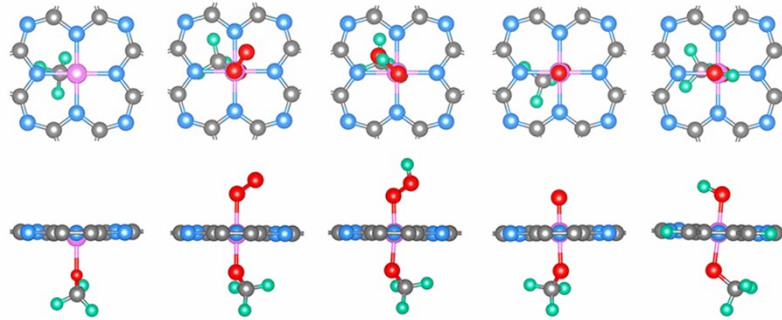

\* \*O<sub>2</sub> \*OOH \*O \*OH

CoPPc-N<sub>3</sub>

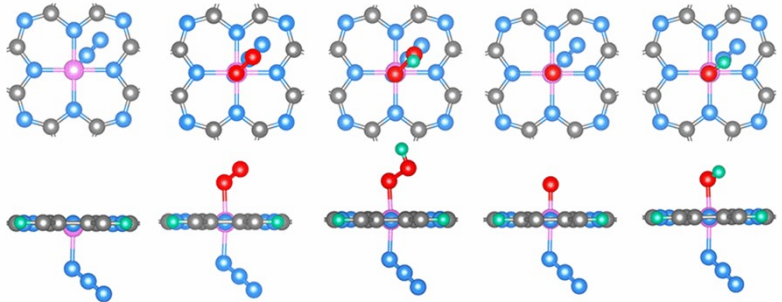

\* \*O<sub>2</sub> \*OOH \*O \*OH

CoPPc-Cl

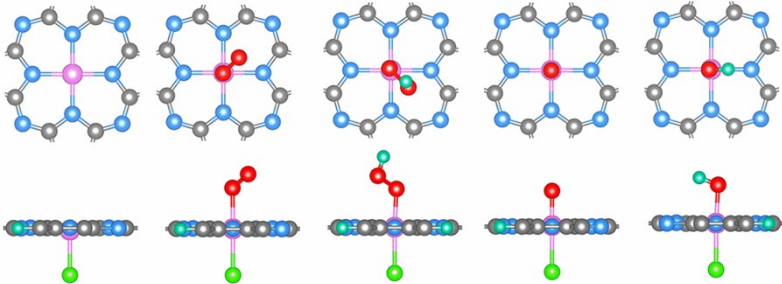

\* \*O<sub>2</sub> \*OOH \*O \*OH

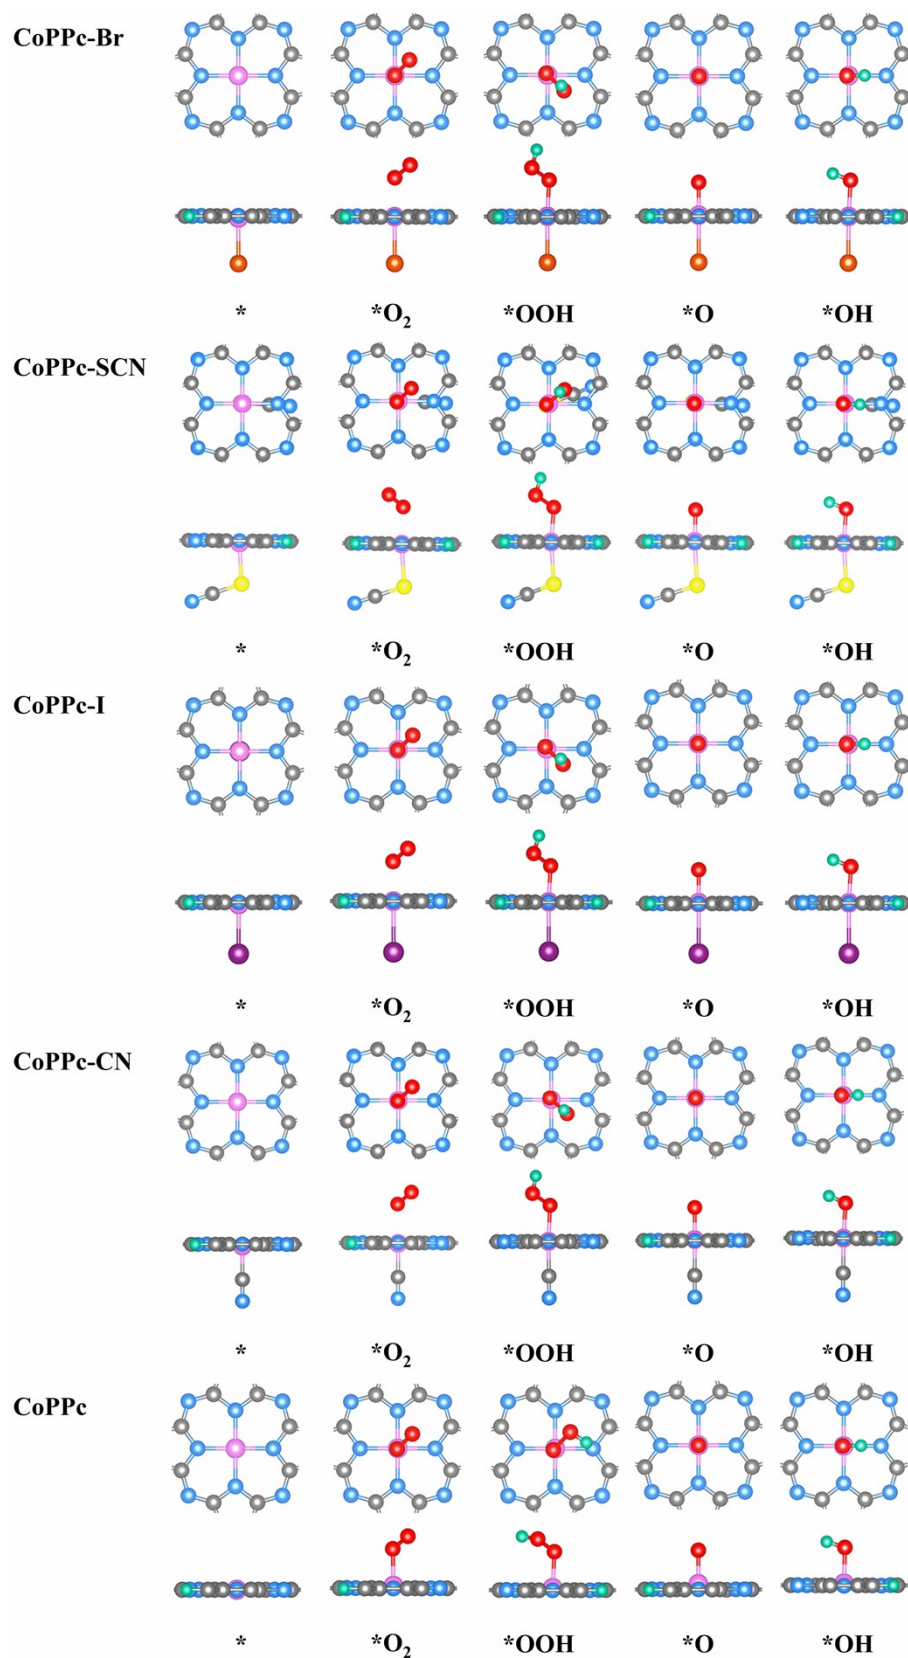

**Fig.S1.** Optimized geometric structure of the CoPPc and various CoPPc-L with top and side views.

The green, gray, blue, pink, cyan, yellow, light green, orange and purple represent H, C, N, Co, F, S, Cl, Br and I atoms, respectively.

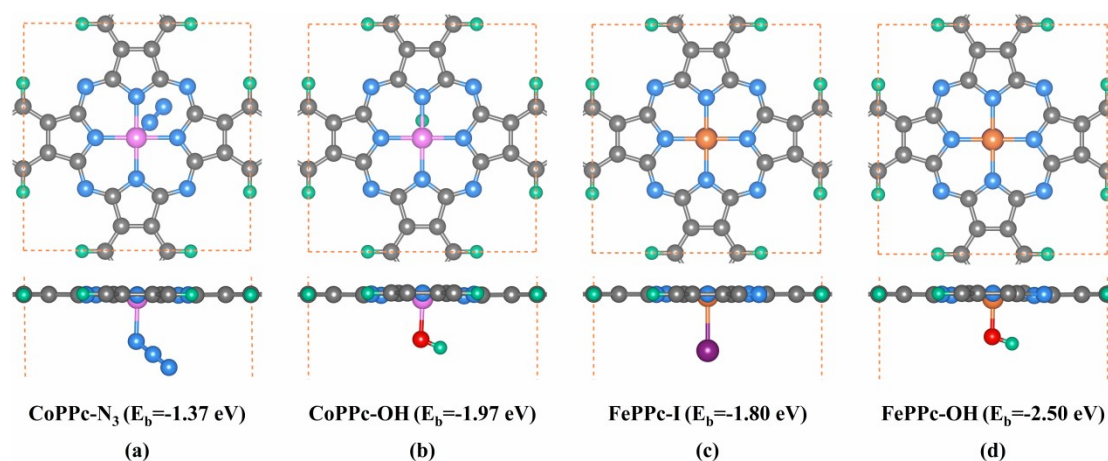

**Fig.S2.(a)-(d)** Top view and side view of the unit cell of CoPPc-N<sub>3</sub>, CoPPc-OH, FePPc-I and FePPc-OH, respectively. The green, gray, blue, red, purple, pink and orange represent H, C, N, O, I, Co and Fe atoms, respectively.

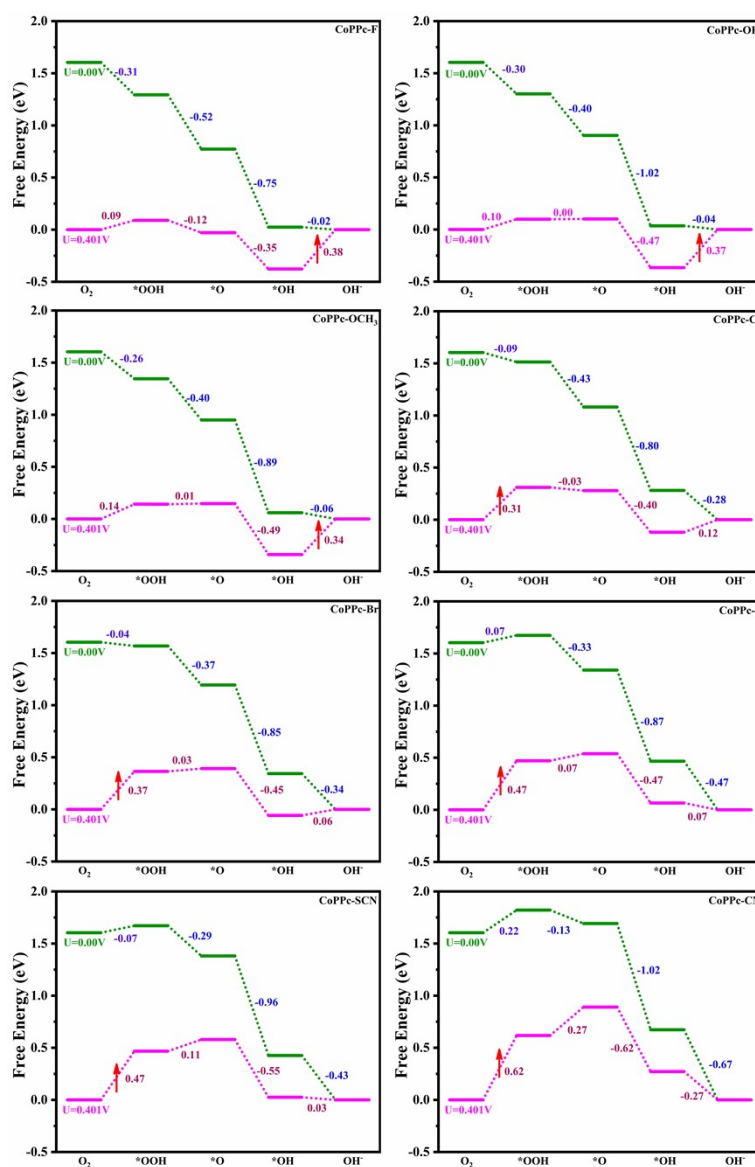

**Fig.S3.** Free energy change of ORR on CoPPc-L, respectively. The calculated working potential is marked by the green line.  $\eta$  denotes the overpotential of ORR.

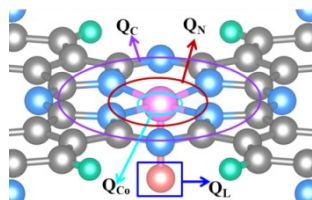

**Fig.S4.**  $Q_{Co}$ ,  $Q_N$ ,  $Q_C$  and  $Q_L$  represent bader charge of cobalt atom (Cyan circle), total bader charge of four N atoms directly connected with cobalt atom (red circle), total bader charge of eight C atoms directly connected with these four N atoms (purple circle) and bader charge of axial ligands (blue circle) in the Coppc-L, respectively.

**Table S1.** Lattice parameters of CoPPc and CoPPc-L (in Å).

| Structure              | Lattice parameters | Lattice parameters |
|------------------------|--------------------|--------------------|
| CoPPc-F                | a=16.630           | b=16.630           |
| CoPPc-OH               | a=16.640,          | b=16.636           |
| CoPPc-OCH <sub>3</sub> | a=16.641           | b=16.637           |
| CoPPc-N <sub>3</sub>   | a=16.636           | b=16.636           |
| CoPPc-Cl               | a=16.628           | b=16.628           |
| CoPPc-Br               | a=16.628           | b=16.628           |
| CoPPc-SCN              | a=16.628           | b=16.631           |
| CoPPc-I                | a=16.628           | b=16.628           |
| CoPPc-CN               | a=16.627           | b=16.627           |
| CoPPc                  | a=16.632           | b=16.632           |

**Table S2.**  $Q_{Co}$ ,  $Q_N$ ,  $Q_C$  and  $Q_L$  represent Bader charge of cobalt atom, total Bader charge of four N atoms directly connected with the Co atom, total Bader charge of eight C atoms directly connected with the four N atoms and Bader charge of axial ligands in CoPPc and the Coppc-L, respectively.

| Structure              | $Q_{Co}$ ( e ) | $Q_N$ ( e ) | $Q_C$ ( e ) | $Q_L$ ( e ) |
|------------------------|----------------|-------------|-------------|-------------|
| CoPPc-F                | 1.28           | -4.51       | 8.30        | -0.64       |
| CoPPc-OH               | 1.21           | -4.54       | 8.23        | -0.39       |
| CoPPc-OCH <sub>3</sub> | 1.16           | -4.40       | 7.92        | -0.32       |
| CoPPc-N <sub>3</sub>   | 1.10           | -4.67       | 8.48        | -0.41       |
| CoPPc-Cl               | 1.08           | -4.49       | 8.20        | -0.35       |
| CoPPc-Br               | 1.09           | -4.52       | 8.19        | -0.31       |
| CoPPc-SCN              | 1.06           | -4.55       | 8.20        | -0.28       |
| CoPPc-I                | 0.98           | -4.54       | 8.17        | -0.14       |
| CoPPc-CN               | 1.05           | -4.49       | 8.20        | -0.31       |
| CoPPc                  | 1.13           | -4.73       | 8.12        | ---         |
